# Supplementary material
Source: PubMed Central journal article supplement (PMC10121866)
Supplement: NIHMS1867496-supplement-1.pdf [file NIHMS1867496-supplement-1.pdf]

**Supplementary Table 1:** Characteristics of individuals included from each site

|                               | <b>Melbourne, Australia</b><br>( <i>n</i> = 295 eyes from 190 individuals) | <b>San Diego, CA</b><br>( <i>n</i> = 218 eyes from 148 individuals) | <b>New York, NY</b><br>( <i>n</i> = 116 eyes from 75 individuals) | <b>Birmingham, AL</b><br>( <i>n</i> = 64 eyes from 48 individuals) |
|-------------------------------|----------------------------------------------------------------------------|---------------------------------------------------------------------|-------------------------------------------------------------------|--------------------------------------------------------------------|
| Age (years)                   | 63 ± 10                                                                    | 71 ± 9                                                              | 63 ± 12                                                           | 68 ± 11                                                            |
| Female (%)                    | 89 (47)                                                                    | 72 (49)                                                             | 43 (57)                                                           | 28 (58)                                                            |
| POAG (%)                      | 247 (84)                                                                   | 218 (100)                                                           | 116 (110)                                                         | 64 (100)                                                           |
| Baseline MD (dB)              | -3.87 (-8.72 to -1.19)                                                     | -3.28 (-7.43 to -1.39)                                              | -6.29 (-12.18 to -2.28)                                           | -6.19 (-14.36 to -2.87)                                            |
| Baseline PSD (dB)             | 3.33 (1.97 to 9.10)                                                        | 4.24 (2.53 to 8.60)                                                 | 6.56 (2.83 to 10.55)                                              | 6.97 (2.92 to 11.67)                                               |
| Follow-Up Visits ( <i>n</i> ) | 5 (5 to 7)                                                                 | 9 (7 to 14)                                                         | 10 (7 to 11)                                                      | 7 (6 to 9)                                                         |
| Follow-Up Duration (years)    | 4.6 (4.1 to 4.9)                                                           | 4.5 (3.9 to 4.8)                                                    | 4.6 (4.1 to 4.9)                                                  | 4.5 (3.4 to 4.7)                                                   |

**Notes:** POAG = primary open angle glaucoma; MD = mean deviation; PSD = pattern standard deviation; dB = decibels; *n* = number. All data is presented either as a mean ± standard deviation, number (percentage) or median (interquartile range).
